# Supplementary material for: A novel β-MnO2and carbon nanotube composite with potent electrochemical properties synthesized using a microwave-assisted method for use in supercapacitor electrodes
Source: Royal Society of Chemistry journal article supplement (doi:10.1039/d2nj02579e), 2022-01-01
Supplement: d2nj02579e1.pdf [file d2nj02579e1.pdf]

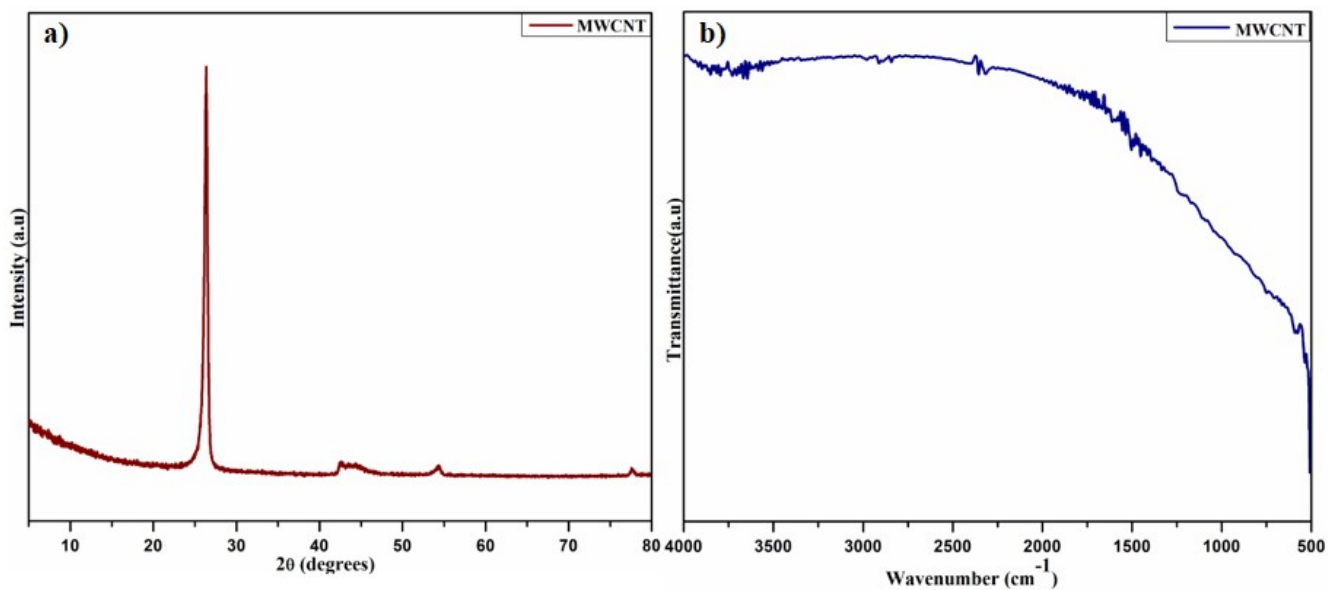

S1. (a) XRD spectra of MWCNT and (b) FTIR spectra of MWCNT

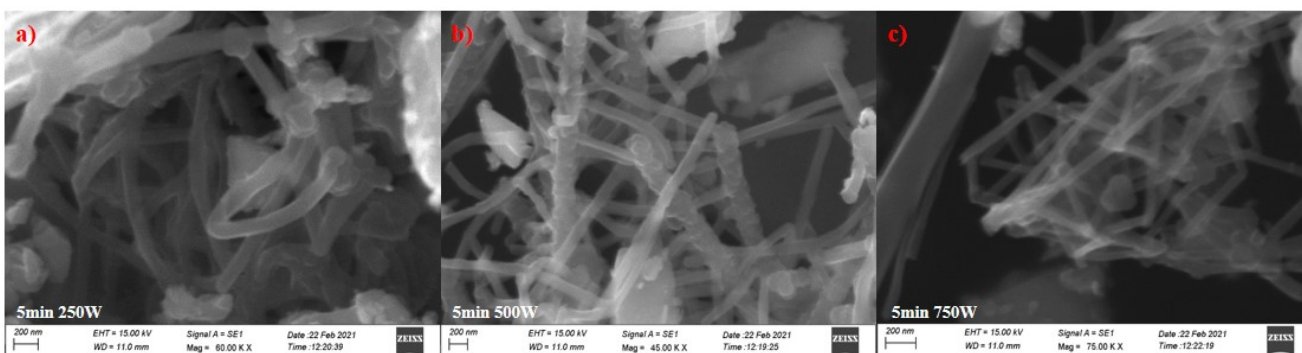

S2. SEM micrographs of  $\beta$ -MnO<sub>2</sub>/CNT nanocomposite under the optimal conditions

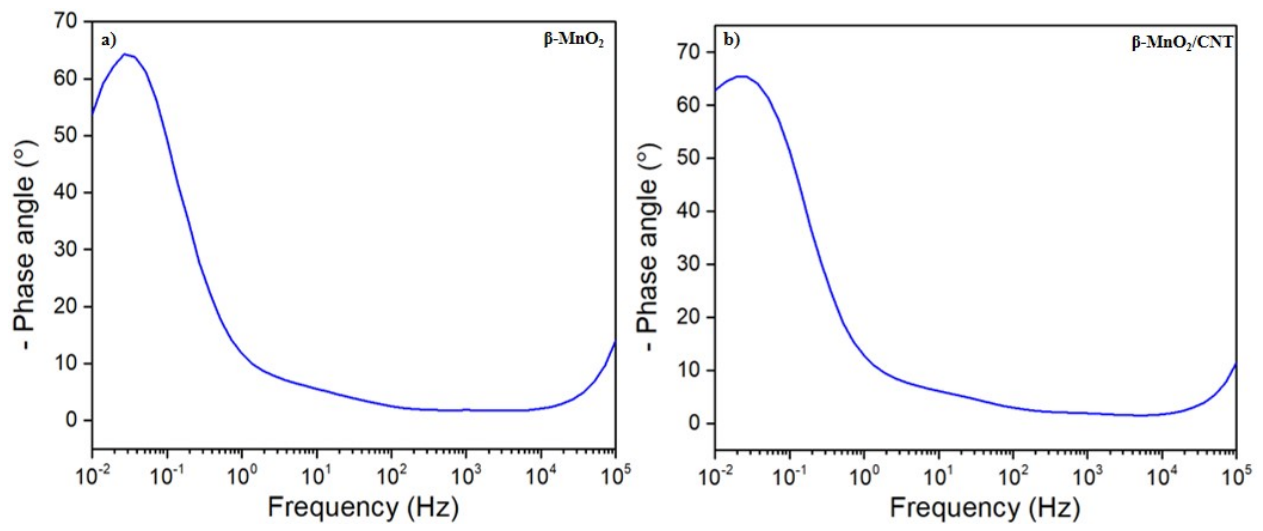

**S3.** Bode plots for the (a) pristine  $\beta\text{-MnO}_2$  and (b)  $\beta\text{-MnO}_2/\text{CNT}$  composite.

**Table.1**

| <b>Material</b>                             | <b>Synthesis process</b>   | <b>Electrolyte</b>              | <b>Specific capacitance</b>                      | <b>Capacitance retention</b> | <b>Ref.</b>      |
|---------------------------------------------|----------------------------|---------------------------------|--------------------------------------------------|------------------------------|------------------|
| MnO <sub>2</sub> /MWCNT                     | Wet chemical route         | Na <sub>2</sub> SO <sub>4</sub> | 106 F g <sup>-1</sup> at 0.5 A g <sup>-1</sup>   | 95% @ 1000 cycles            | (1)              |
| Amorphous MWCNT/MnO <sub>2</sub> nanoflakes | Wet chemical route         | Na <sub>2</sub> SO <sub>4</sub> | 108.5 F g <sup>-1</sup> at 0.7 A g <sup>-1</sup> | ~1400 cycles                 | (2)              |
| 3D MnO <sub>2</sub> -CNT                    | hydrothermal               | Na <sub>2</sub> SO <sub>4</sub> | 214 Fg <sup>-1</sup> at 5mV s <sup>-1</sup>      |                              | (3)              |
| MnO <sub>2</sub> /PEDOT                     | electro codeposition       | KCl                             | 89.7 at 10 mV s <sup>-1</sup>                    | 97.1 % at 5000 cycles        | (4)              |
| NCNTs@MnO <sub>2</sub>                      | chemical method            | Na <sub>2</sub> SO <sub>4</sub> | 219 F g <sup>-1</sup> at 1 A g <sup>-1</sup>     | 86.8% 1000 cycles            | (5)              |
| MnO <sub>2</sub> /MWCNT<br>3:1              | hydrothermal route         | KCl                             | 252 F g <sup>-1</sup> at 0.5 A g <sup>-1</sup>   | 95% @ 920 cycles             | (6) <sup>1</sup> |
| β-MnO <sub>2</sub> /CNT                     | Microwave processing route | Na <sub>2</sub> SO <sub>4</sub> | 263.8 F g <sup>-1</sup> at A g <sup>-1</sup>     | This work                    |                  |

## Reference

- (1) D. Z. W. Tan, H. Cheng, S. T. Nguyen and H. M. Duong, Controlled synthesis of MnO<sub>2</sub>/CNT nanonano hybrids for supercapacitor applications, *Mater. Technol.*, 2014, 29, A107–A113
- (2) D. Ganguly, D. Pahari, N. S. Das, P. Howli, B. Das, D. Banerjee and K. K. Chattopadhyay, All-amorphous CNT-MnO<sub>2</sub> nanoflaky hybrid for improved supercapacitor applications, *J. Electroanal. Chem.*, 2016, 778, 12–22
- (3) F. Teng, S. Santhanagopalan, Y. Wang and D. D. Meng, *J. Alloys Compd.*, 499 (2010) 259.
- (4) H. Zhou, X. Zhi, H. J. Zhai, *Mater. Electron.* 29 (2018) 3935–3942.
- (5) X. Ou, Q. Li, D. Xu, J. Guo, F. Yan, *Chem. Asian J.*, 13 (2018) 545–551.
- (6) H. Zhou, X. Zhi, H. J. Zhai, *Mater. Electron.*, 29 (2018) 3935–3942. 1. A.Subagio, *International Journal of Electrochemical Science*, 2019, DOI: 10.20964/2019.10.52, 9936-9947.
